# Supplementary material
Source: HighWire-hosted journal article supplement (http://www.jrheum.org/highwire/filestream/33074/field_highwire_adjunct_files/0/170748_Data_Suppl.pdf)
Supplement: 170748_Data_Suppl.pdf [file 170748_Data_Suppl.pdf]

**ONLINE SUPPLEMENTARY DATA.**

Supplementary Table 1. Classification of occupations.

| ISCO-88 code | ISCO-88 (COM) occupational group                             | Occupational group for the present study | Most common occupations for men                       | Most common occupations for women                                                                                |
|--------------|--------------------------------------------------------------|------------------------------------------|-------------------------------------------------------|------------------------------------------------------------------------------------------------------------------|
| 11           | Legislators and senior government officials                  | Managers                                 | Specialists managers (123)                            | Production and operation managers (122), specialists managers (123)                                              |
| 12           | Corporate managers                                           |                                          |                                                       |                                                                                                                  |
| 13           | Managers of small enterprises                                |                                          |                                                       |                                                                                                                  |
| 21           | Physical, mathematical and engineering science professionals | Professionals                            | Architects, engineers and related professionals (214) | Business professional (241), health professionals (except nursing) (222)                                         |
| 22           | Life science and health professionals                        |                                          |                                                       |                                                                                                                  |
| 24           | Other professionals                                          |                                          |                                                       |                                                                                                                  |
| 23           | Teaching professionals                                       | Teaching professionals                   | Secondary education teaching professionals (232),     | Secondary education teaching professionals (232), primary and pre-primary education teaching professionals (233) |

|    |                                                             |                                                 |                                                                                                                                   |                                                                                                  |
|----|-------------------------------------------------------------|-------------------------------------------------|-----------------------------------------------------------------------------------------------------------------------------------|--------------------------------------------------------------------------------------------------|
| 31 | Physical and engineering science<br>associate professionals | Physical and engineering<br>science technicians | Physical and engineering science<br>technicians (311)                                                                             | Physical and engineering science<br>technicians (311)                                            |
| 32 | Life science and health associate<br>professionals          | Environmental officers and<br>nurses            | Life science technicians and related<br>associate professional (321), health<br>associate professionals (except nursing)<br>(322) | Nursing and midwifery associate<br>professionals (323)                                           |
| 33 | Teaching associate professionals                            | Finance and sales associate                     | Finance and sales associate                                                                                                       | Finance and sales associate                                                                      |
| 34 | Other associate professionals                               | professionals and<br>administrative secretaries | professionals (341)                                                                                                               | professionals (341), administrative<br>secretaries and related associate<br>professionals (3431) |
| 41 | Office clerks                                               | Office clerks                                   | Mail carriers and sorting clerks (4142),<br>material-recording and transport clerks<br>(413)                                      | Secretaries (4115)                                                                               |
| 42 | Customer services clerks                                    | Customer services clerks                        | Client information clerks (422), tellers<br>and other counter clerks (4212)                                                       | Tellers and other counter clerks (4212)                                                          |

|    |                                                                  |                                                 |                                                                                                  |                                                                                                                            |
|----|------------------------------------------------------------------|-------------------------------------------------|--------------------------------------------------------------------------------------------------|----------------------------------------------------------------------------------------------------------------------------|
| 51 | Personal and protective services workers                         | Services workers                                | Housekeeping and restaurant services workers (512), protective services workers (516)            | Practical nurses (5132), child care workers (5131), home care assistants, personal care workers (5133)                     |
| 52 | Models, salespersons and demonstrators                           | Shop workers                                    | Shop, stall and market salespersons and demonstrators (5220)                                     | Shop, stall and market salespersons and demonstrators (5220)                                                               |
| 61 | Skilled agricultural and fishery workers                         | Agricultural and fishery workers                | Market gardeners and crop growers (611), animal producers and related workers (612)              | Market gardeners and crop growers (611), animal producers and related workers (612)                                        |
| 92 | Unskilled agricultural and fishery workers                       |                                                 |                                                                                                  |                                                                                                                            |
| 71 | Extraction and building trades workers                           | Construction workers, electricians and plumbers | Building frame and related trades workers (712)                                                  | Building frame and related trades workers (712)                                                                            |
| 72 | Metal, machinery and related trades workers                      | Metal and machinery workers                     | Machinery mechanics and fitters (723), blacksmiths, tool-makers and related trades workers (722) | Electrical and electronic equipment mechanics and fitters (724), blacksmiths, tool-makers and related trades workers (722) |
| 73 | Precision, handicraft, craft printing and related trades workers | Craft workers                                   | Cabinetmakers and related workers (7422)                                                         | Textile, garment and related trades workers (743)                                                                          |
| 74 | Other craft and related trades workers                           |                                                 |                                                                                                  |                                                                                                                            |

|    |                                             |                                                                     |                                                                                                                       |                                                                               |
|----|---------------------------------------------|---------------------------------------------------------------------|-----------------------------------------------------------------------------------------------------------------------|-------------------------------------------------------------------------------|
| 81 | Stationary plant and related operators      | Chemical, wood and metal processing workers                         | Chemical-processing-plant operators (815), papermaking-plant operators (8143), wood-processing-plant operators (8141) | Chemical-processing-plant operators (815)                                     |
| 82 | Machine operators and assemblers            | Machine operators and assemblers                                    | Metal- and mineral-products machine operators (821), mechanical-machinery assemblers (8281)                           | Assemblers (828), food and related products machine operators (827)           |
| 83 | Drivers and related water traffic operators | Professional drivers                                                | Motor vehicle drivers (832)                                                                                           | Motor vehicle drivers (832)                                                   |
| 91 | Sales and services elementary occupations   | Building caretakers, cleaners, assistant nurses and kitchen workers | Building caretakers (9141)                                                                                            | Hospital, domestic and kitchen helpers, cleaners (9132)                       |
| 93 | Laborers in manufacturing and construction  | Unskilled transport, construction and manufacturing workers         | Transport laborers and freight handlers (9330)                                                                        | Transport laborers and freight handlers (9330), manufacturing laborers (9320) |
